# Supplementary material for: Kynurenic acid inhibits macrophage pyroptosis by suppressing ROS production via activation of the NRF2 pathway
Source: PubMed Central journal article supplement — Mol Med Rep. 2023 Sep 22;28(5):211. doi: 10.3892/mmr.2023.13098 (PMC10552067; doi:10.3892/mmr.2023.13098), 2023-09-22

Figure S1. Toxicity of different concentrations of KA on macrophages. A range of concentrations (0-500  $\mu$ M) KA was used to treat macrophages for 24 h, after which CCK-8 assays were used to evaluate cell viability. \*\*\* $P < 0.001$  vs. 0  $\mu$ M KA.  $n = 5$  per group. KA, Kynurenic acid.

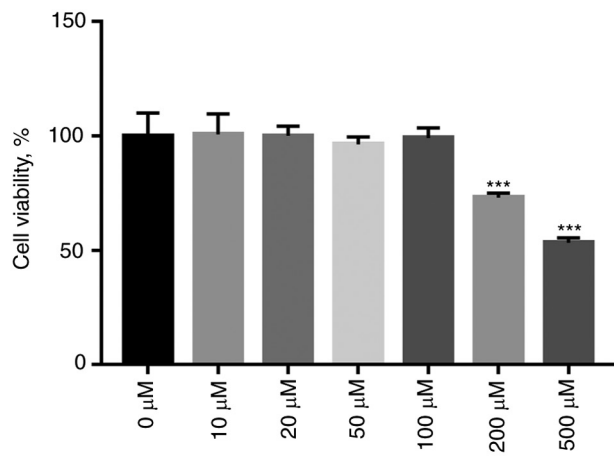

Figure S2. VX-765 inhibits LPS-induced macrophage pyroptosis. A total of 2  $\mu$ M VX-6765 was used to pre-treat macrophages for 30 mins, followed by 200 ng/ml LPS for 24 h. (A) CCK-8 assay. (B) LDH assay. (C and D) GSDMD levels. n=3. \*P<0.05 vs. CTRL group; #P<0.05 vs. LPS group.

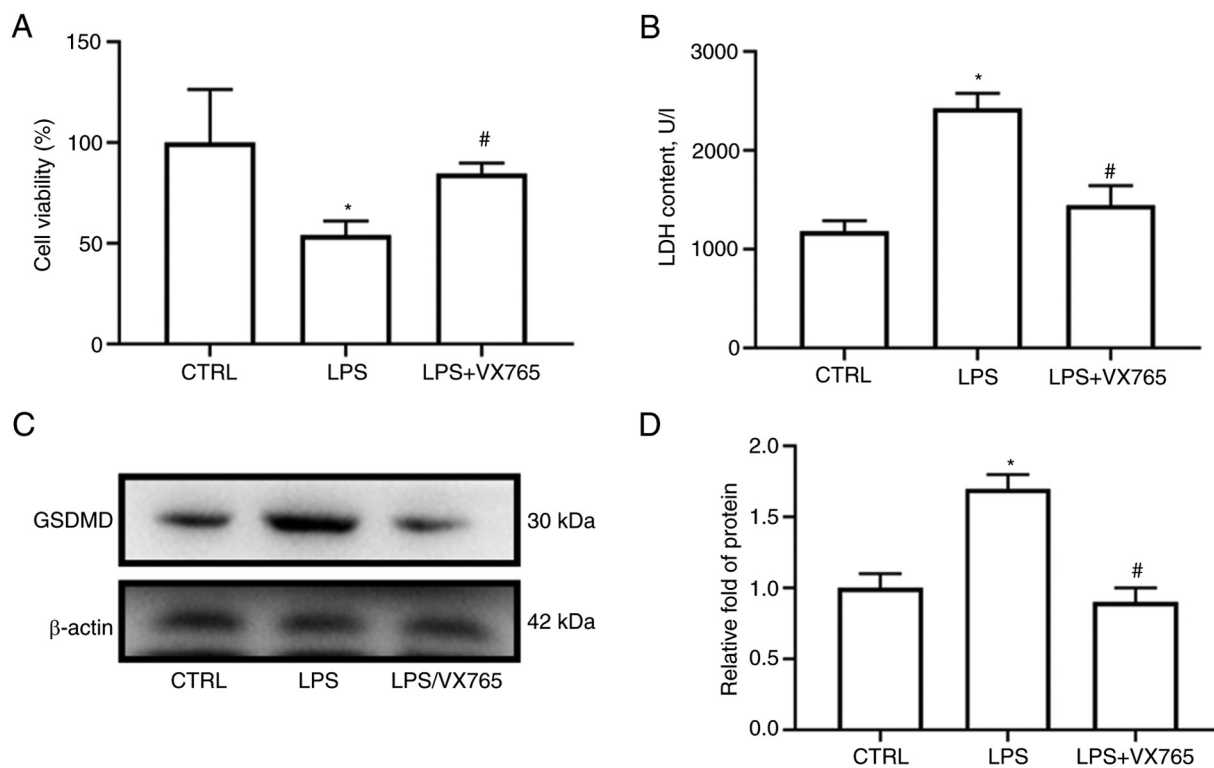

Figure S3. KA alone does not affect total NRF2 levels. Macrophages were divided into three groups. CTRL group; LPS group, macrophages were treated with 200 ng/ml LPS for 24 h, and the KA/LPS group, macrophages were treated with 100  $\mu$ M KA for 0.5 h followed by 200 ng/ml LPS for 24 h, after which the NLRP3, Caspase1 and GSDMD levels was measured. NLRP3, NOD-like receptor protein 3; GSDMD, Gasdermin-D; KA, Kynurenic acid.

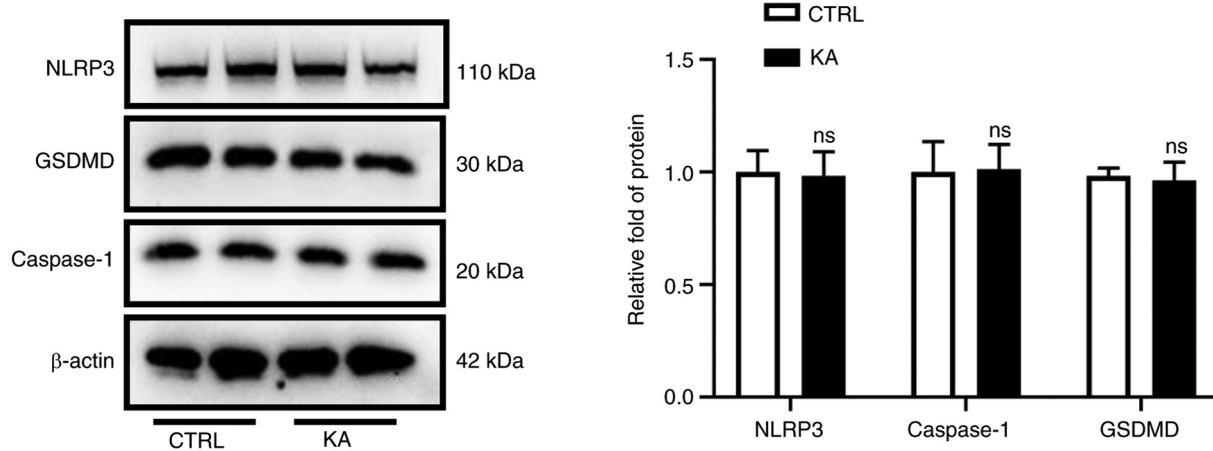

Figure S4. KA does not affect the total NRF2 levels. Macrophages were divided into three groups. CTRL group; LPS group, macrophages were treated with 200 ng/ml LPS for 24 h, and the KA/LPS group, macrophages were treated with 100  $\mu$ M KA for 0.5 h followed by 200 ng/ml LPS for 24 h, after which the NRF2 levels were measured. NRF2, nuclear factor erythroid 2-related factor 2; KA, Kynurenic acid.

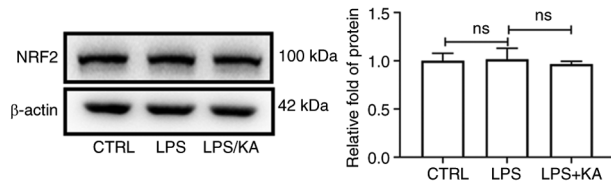

Supplement: Supplementary_Data.pdf [file Supplementary_Data.pdf]
